# Supplementary material
Source: publisher figshare collection journal article supplement (https://plos.figshare.com/articles/dataset/_/11915445)

S3 Fig: Phylogenetic tree of all publicly available reference Salmonella genomes, all S. Wangata isolates, and seven draft genomes of serovars of interest. The S. Wangata cluster (shaded in orange) is comprised of all S. Wangata isolates and S. Slotedijk (ATCC 15791)

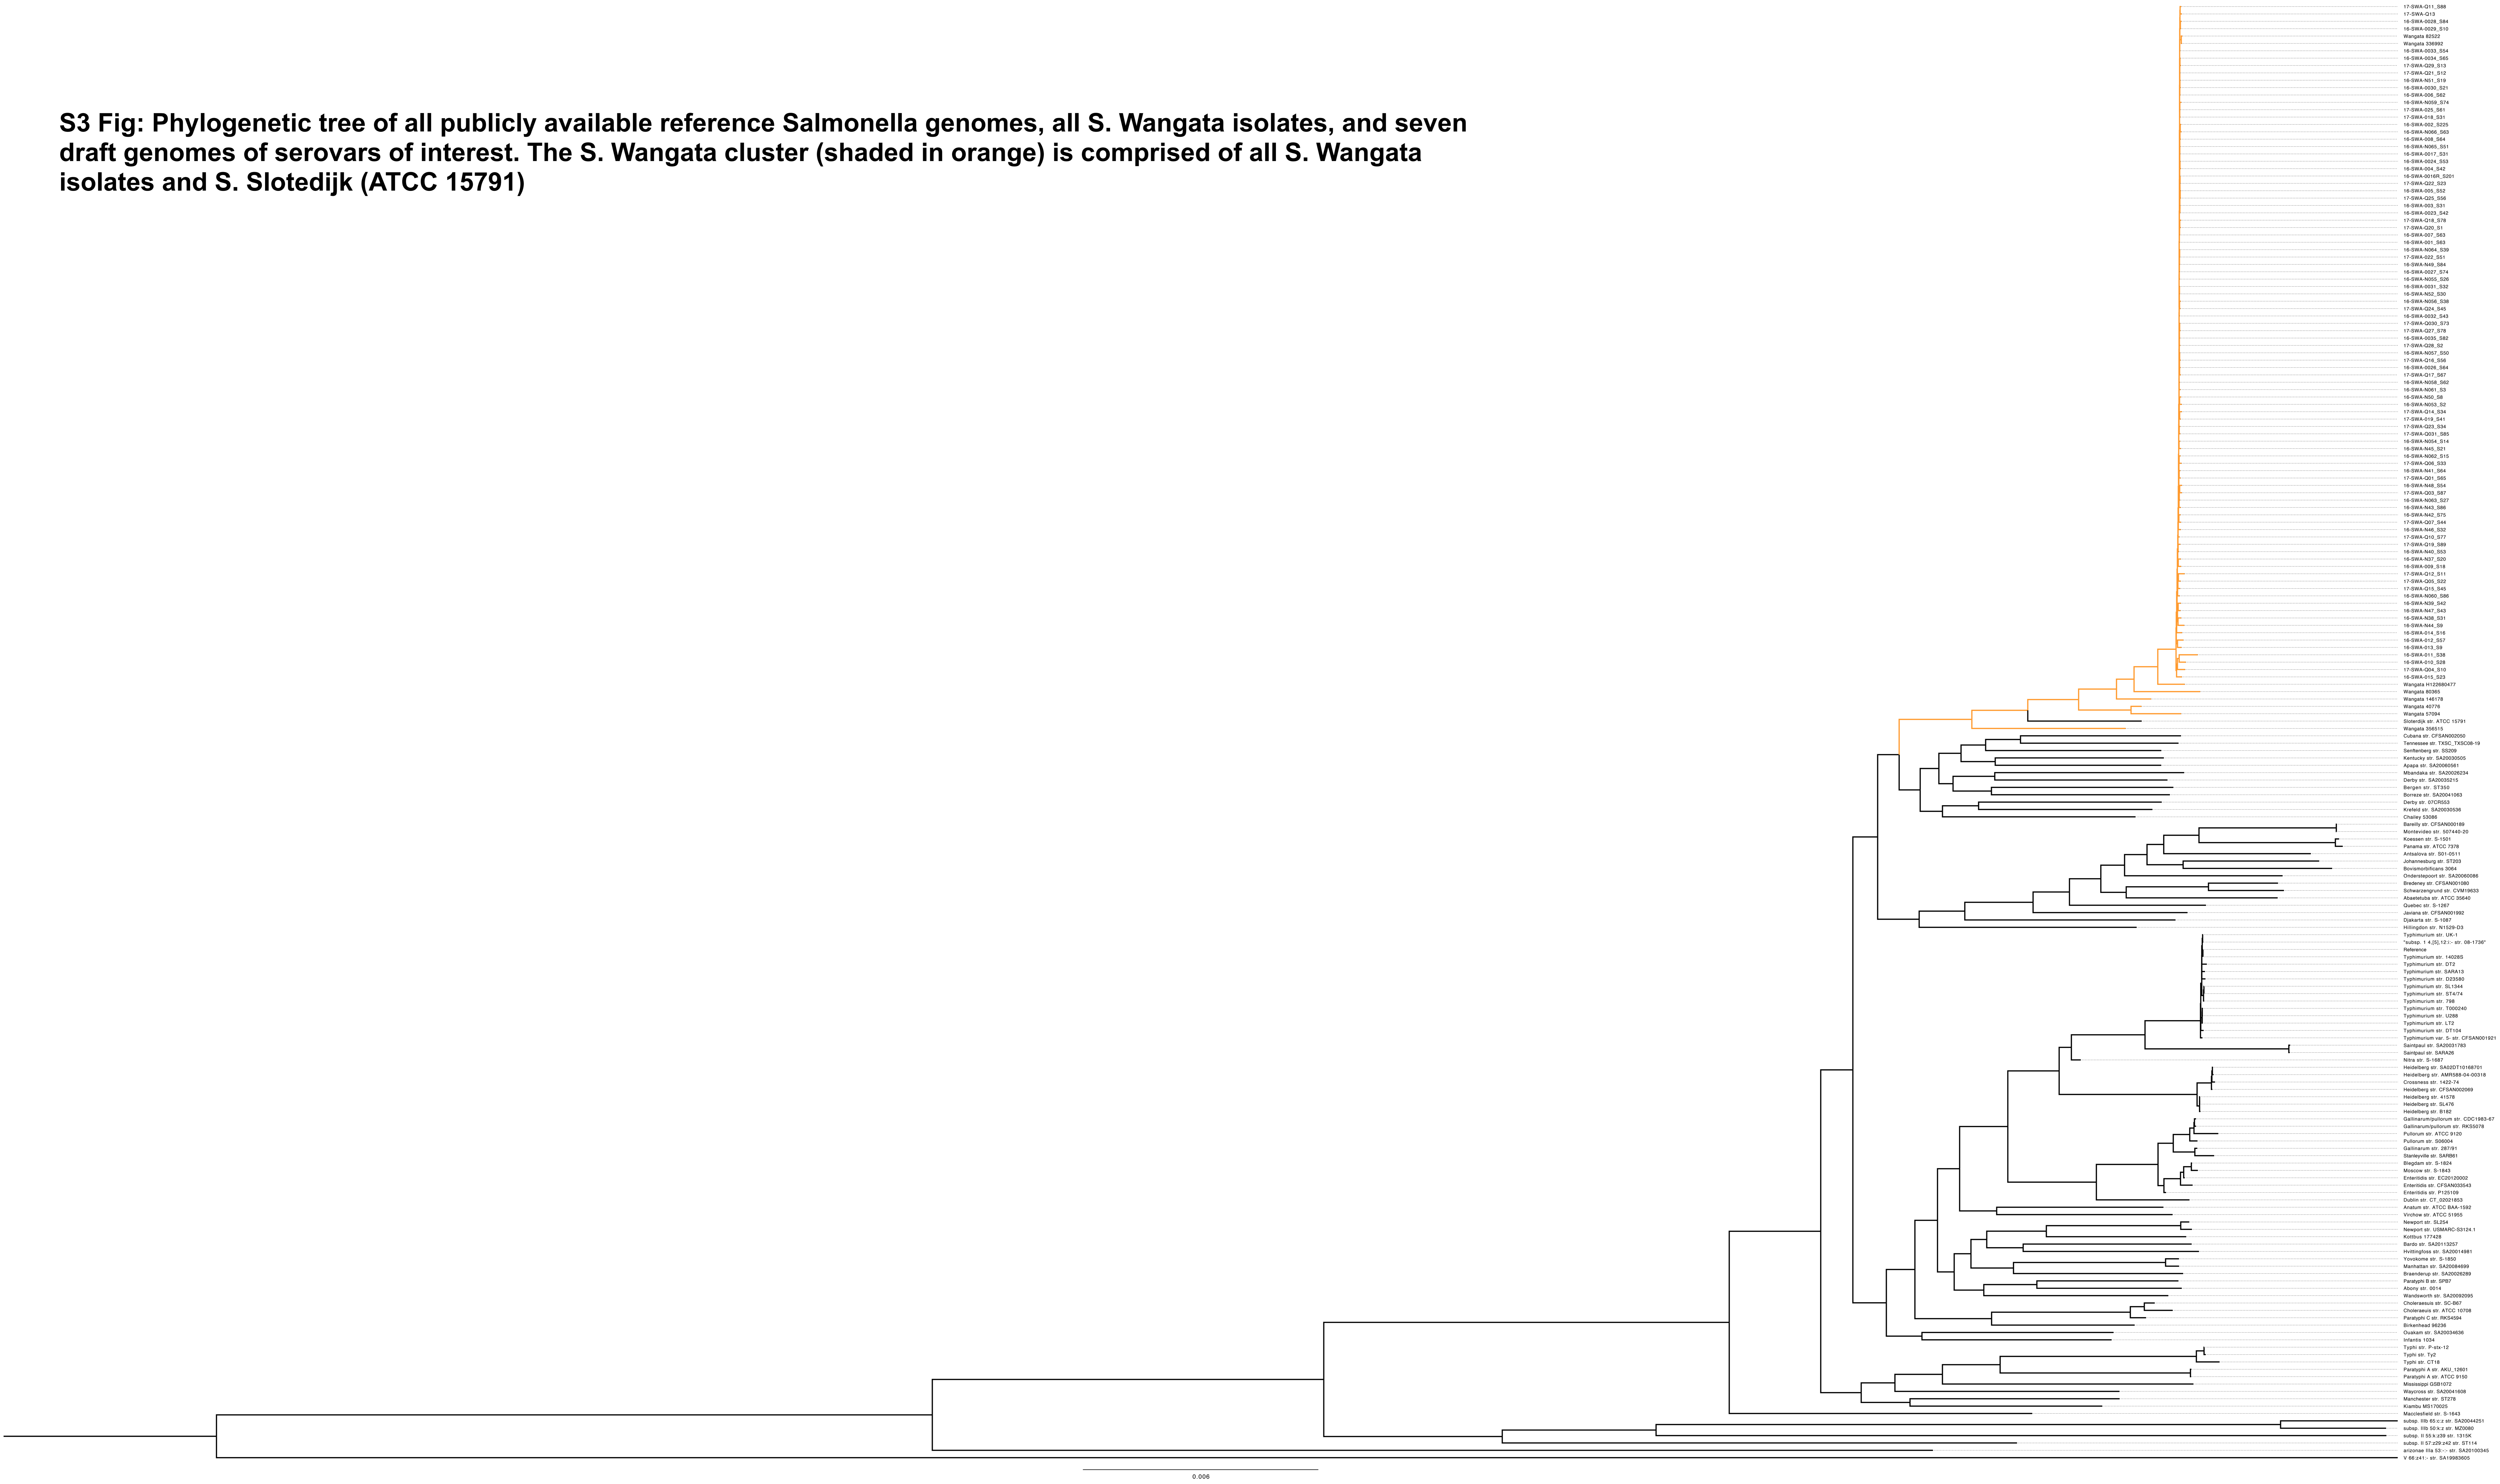

Supplement: Supplementary file [file 1]
